# Supplementary material for: The adverse impact of herbicide Roundup Ultra Plus in human spermatozoa plasma membrane is caused by its surfactant
Source: PubMed Central journal article supplement (PMC9338072; doi:10.1038/s41598-022-17023-3), 2022-07-29
Supplement: 41598_2022_17023_MOESM1_ESM.pdf [file 41598_2022_17023_MOESM1_ESM.pdf]

**The adverse impact of herbicide Roundup® Ultra Plus in human spermatozoa plasma membrane is caused by its surfactant**

Mercedes Torres-Badia, Soraya Solar-Malaga, Rebeca Serrano, Luis J Garcia-Marin, M. Julia Bragado

**Supplementary Table 1. Effects of Roundup® Ultra Plus (RUP), glyphosate (GLY) and surfactant polyoxyethylene amine (POEA) in human sperm motility descriptor parameters.**

| Treatment                                  | Motile spermatozoa (%) | Progressive spermatozoa (%) | VCL (%)    | VSL (%)    | VAP (%)    | LIN %      | STR %      | WOB%       | BCF       | ALH       |
|--------------------------------------------|------------------------|-----------------------------|------------|------------|------------|------------|------------|------------|-----------|-----------|
| <b>Control</b>                             | 63.85±5.64             | 56.77±5.32                  | 87.65±3.83 | 53.38±3.14 | 58.65±3.09 | 60.35±1.51 | 84.56±0.80 | 67.73±1.32 | 9.26±0.24 | 2.92±0.09 |
| <b>RUP 0.01%</b>                           | 49.88±6.34             | 41.90±5.74                  | 83.16±3.95 | 47.83±4.06 | 53.03±3.67 | 56.25±2.88 | 82.22±1.84 | 64.33±2.21 | 8.70±0.36 | 2.92±0.14 |
| <b>POEA 0.0008%</b>                        | 45.48±5.74             | 37.34±5.24                  | 74.77±3.20 | 44.05±2.87 | 48.25±2.62 | 57.05±2.30 | 83.36±1.81 | 64.65±1.60 | 8.81±0.34 | 2.69±0.11 |
| <b>Glyphosate 0.36mg/mL</b>                | 64.27±6.25             | 56.39±5.92                  | 88.34±3.57 | 54.16±2.81 | 59.17±3.03 | 60.21±1.32 | 84.30±0.80 | 67.24±1.14 | 9.42±0.20 | 2.90±0.09 |
| <b>Glyphosate 0.36mg/mL + POEA 0.0008%</b> | 49.04±7.10             | 40.64±6.24                  | 73.75±3.86 | 43.31±3.50 | 46.99±3.33 | 56.93±2.93 | 84.20±1.54 | 63.95±2.39 | 8.52±0.39 | 2.68±0.13 |

Human spermatozoa were incubated in BWW 1 h at 37 °C, 5% CO<sub>2</sub>, in the absence or presence of indicated concentrations of RUP, GLY, POEA or POEA plus GLY. Sperm kinematic parameters were evaluated by ISAS® system: curvilinear velocity (VCL, µm/s), linear velocity (VSL, µm/s) mean velocity (VAP, µm/s), linearity coefficient (LIN, %), straightness coefficient (STR, %), wobble movement coefficient (WOB, %), mean lateral head displacement (ALH, µm) and frequency of head displacement (BCF, Hz). This experiment was performed 13 times (n = 13) and values are expressed as the mean ± standard error of the mean (SEM).
