# Supplementary material for: The adverse impact of herbicide Roundup Ultra Plus in human spermatozoa plasma membrane is caused by its surfactant
Source: PubMed Central journal article supplement (PMC9338072; doi:10.1038/s41598-022-17023-3), 2022-07-29

# The adverse impact of herbicide Roundup® Ultra Plus in human spermatozoa plasma membrane is caused by its surfactant

Mercedes Torres-Badia, Soraya Solar-Malaga, Rebeca Serrano, Luis J Garcia-Marin, M. Julia Bragado\*.

**Figure S1. Study design.** From the preparations of the human sperm samples and their treatments, to the different parameters analyzed. BWW: Biggers, Whitten and Whittingham; RUP: Roundup® Ultra Plus; POEA: polyoxyethylene amine; GLY: potassium glyphosate; CASA: Computer Assisted Semen Analysis; HOST: hypo-osmotic swelling test.

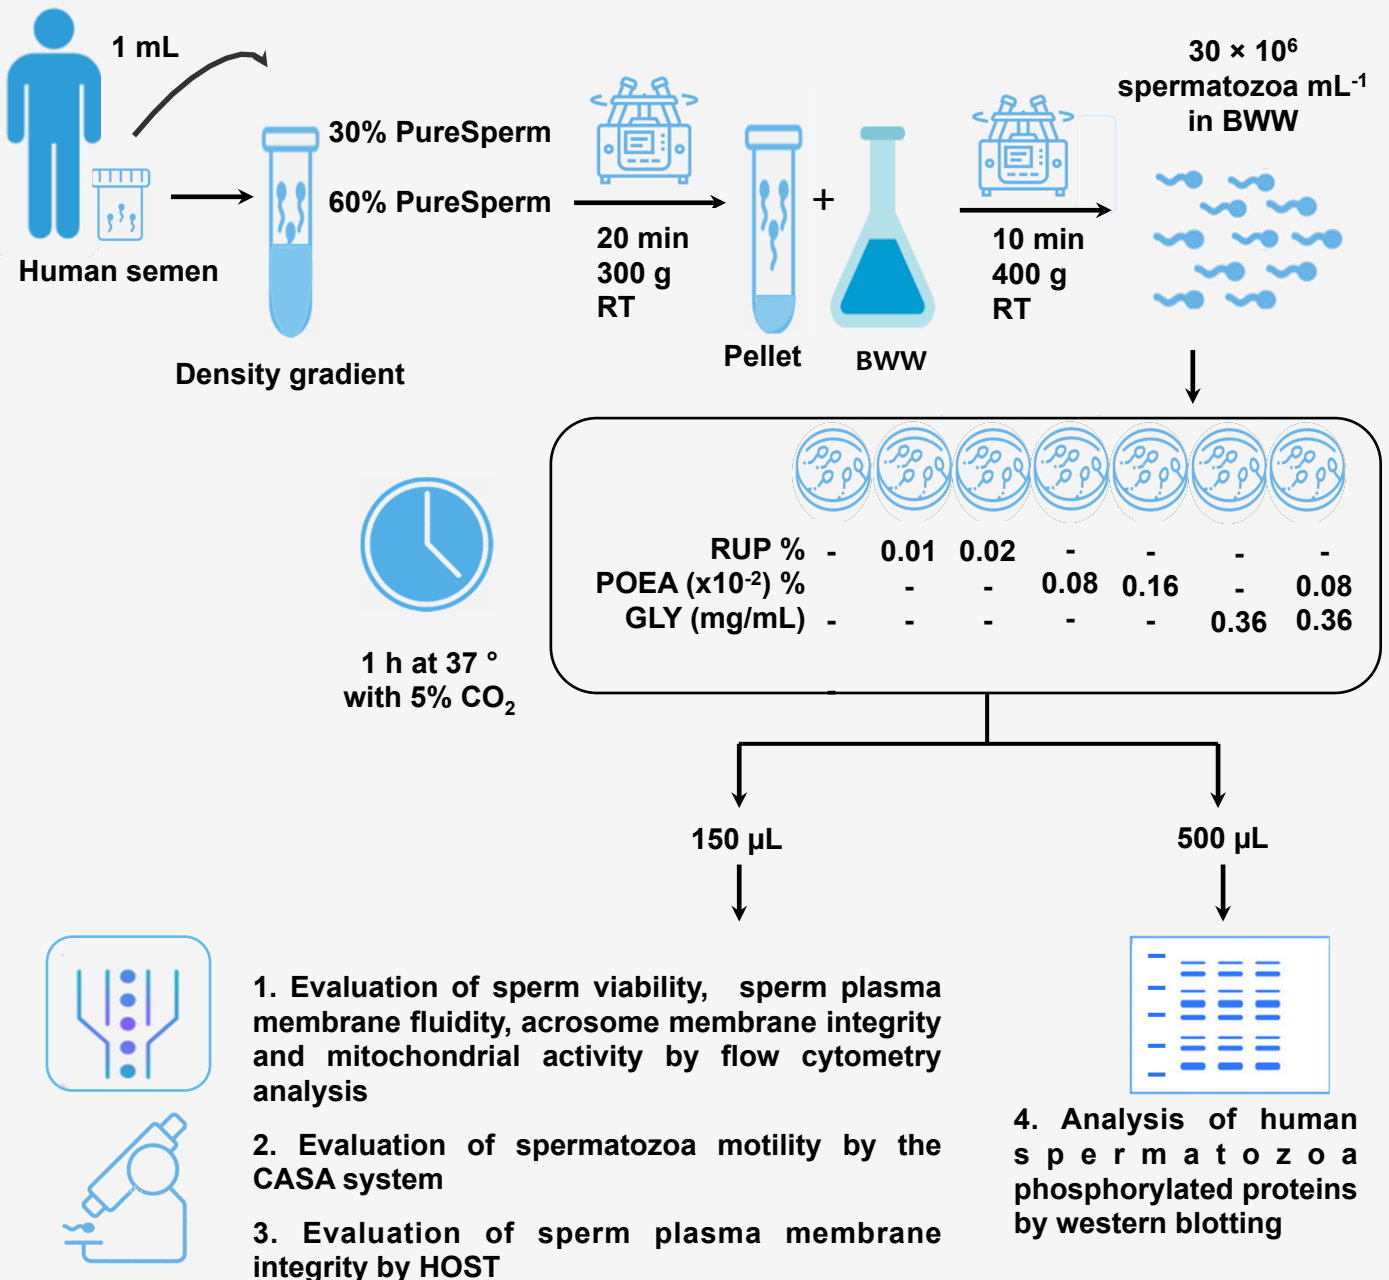

Supplement: 41598_2022_17023_MOESM2_ESM.pdf [file 41598_2022_17023_MOESM2_ESM.pdf]
