# Supplementary material for: The adverse impact of herbicide Roundup Ultra Plus in human spermatozoa plasma membrane is caused by its surfactant
Source: PubMed Central journal article supplement (PMC9338072; doi:10.1038/s41598-022-17023-3), 2022-07-29

The adverse impact of herbicide Roundup® Ultra Plus in human spermatozoa plasma membrane is caused by its surfactant  
Mercedes Torres-Badía, Saraja Solar-Malaga, Rebeca Serrano, Luis J Garcia-Martin, M. Julia Bragado

|                            |   |      |      |      |      |      |      |
|----------------------------|---|------|------|------|------|------|------|
| RUP%                       | - | 0.01 | 0.02 | -    | -    | -    | -    |
| POEA ( $\times 10^{-2}$ )% | - | -    | -    | 0.08 | 0.16 | -    | 0.08 |
| GLY (mol/l)                | - | -    | -    | -    | -    | 0.36 | 0.36 |

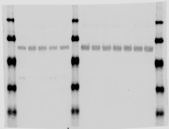

α-Tubulin

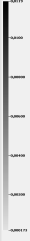

Supplement: 41598_2022_17023_MOESM4_ESM.pdf [file 41598_2022_17023_MOESM4_ESM.pdf]
